# A Multi-Crystal Method for Extracting Obscured Signal from Crystallographic Electron Density

**Authors:** Nicholas M Pearce<sup>1</sup>, Anthony R Bradley<sup>1</sup>, Patrick Collins<sup>2</sup>, Tobias Krojer<sup>1</sup>, Radoslaw P Nowak<sup>1</sup>, Romain Talon<sup>1</sup>, Brian D Marsden<sup>1,4</sup>, Sebastian Kelm<sup>3</sup>, Jiye Shi<sup>3</sup>, Charlotte M Deane<sup>5</sup> and Frank von Delft<sup>1,2,6\*</sup>

---

## Affiliations:

1. Structural Genomics Consortium, Nuffield Department of Medicine, University of Oxford, Roosevelt Drive, Oxford, OX3 7DQ, UK
2. Diamond Light Source Ltd, Harwell Science and Innovation Campus, Didcot, OX11 0QX, UK
3. UCB Pharma, 208 Bath Road, Slough, SL1 3WE, UK
4. Kennedy Institute of Rheumatology, Nuffield Department of Orthopaedics, Rheumatology and Musculoskeletal Sciences, University of Oxford, Roosevelt Drive, Oxford OX3 7FY, UK
5. Department of Statistics, University of Oxford, 24-29 St Giles, Oxford, OX1 3LB, UK
6. Department of Biochemistry, University of Johannesburg, Auckland Park, 2006, South Africa

**NMP, CMD and FvD designed and conducted the research. NMP developed and implemented the algorithm. AB, PC, TK, RN and RT performed the experiments that yielded the crystallographic data. NMP analysed the processed data. NMP, TK and RT established model validation criteria. BM, SK and JS were involved in discussions of the project and revising the manuscript.**

\*Correspondence and requests for materials should be addressed to [frank.vondelft@sgc.ox.ac.uk](mailto:frank.vondelft@sgc.ox.ac.uk).

## One Sentence Summary

Normally uninterpretable map regions are reliably modelled by deconvoluting superposed crystal states, even with poor starting models.

## Abstract

Macromolecular crystallography is relied on to reveal subtle atomic difference between samples (*e.g.* ligand binding); yet their detection and modelling is subjective and ambiguous density is experimentally common, since molecular states of interest are generally only fractionally present. The existing approach relies on careful modelling for maximally accurate maps to make contributions of the minor fractions visible (1); in practice, this is time-consuming and non-objective (2–4). Instead, our *PanDDA* method automatically reveals clear electron density for only the changed state, even from poor models and inaccurate maps, by subtracting a proportion of the confounding ground state, accurately estimated by averaging many ground state crystals. Changed states are objectively identifiable from statistical distributions of density values; arbitrarily large searches are thus automatable. The method is completely general, implying new best practice for all changed-state studies. Finally, we demonstrate

34 the incompleteness of current atomic models, and the need for new multi-crystal deconvolution  
35 paradigms.

## 36 **Background**

37 Besides its use for resolving the overall 3D structure of bio-molecules, macromolecular X-ray  
38 crystallography (MX) is deployed extensively to observe small changes to known structures, especially  
39 compound binding in ligand-discovery and -development projects. Arriving at the final model once  
40 initial electron density estimates are available (after “phasing”), relies on a long-established and rarely-  
41 questioned paradigm: cycling between building atoms into the current density estimate and  
42 computationally optimising the model against the measured data (“refinement”). The latter improves  
43 the calculated phases and yields more detailed density that should reveal additional model omissions  
44 and errors; the process is assumed to converge on a model that fully describes the crystal’s content.

45 In practice, convergence is never convincingly achieved. Much density both strong and weak  
46 invariably remains unexplained (“noisy”), hence the aphorism that “refinement [...] is never finished,  
47 only abandoned” (5), and hence too the “R-factor gap” (6), which has obdurately resisted all  
48 methodology advances. More recent work has shown that conventional single-conformation models  
49 are too simplistic to describe the crystal (7–9); and that electron density features far weaker than the  
50 conventional cut-off reflect model deficiencies rather than measurement error (10, 11).

51 Evidently then, near convergence, conventionally-calculated ( $\sigma_A$ -weighted (12)) density derived  
52 from a single dataset is necessary but insufficient to complete the model, as it shows a superposition  
53 of states that is currently impossible to de-convolute algorithmically. Nearly-complete models with  
54 discrete yet uninterpretable superpositions are common in systematic studies of perturbations  
55 involving few atoms, such as ligand binding, photochemical changes or radiation damage. Since even  
56 strong biophysical effects are contingent on crystal packing or integrity, only a subset of the crystal may  
57 transition away from the ground state, often even after extensive optimization of the experiment.  
58 Finally, all current modelling approaches ultimately rely on shape-matching, and density superpositions  
59 are susceptible to interpretation errors and bias (such as the problem of the “Ligand of Desire” (2)).

60 Existing methods to auto-generate multi-conformer models (8, 9) are not relevant when changes  
61 are chemical, and moreover have had little take-up, presumably because neither is explicit modelling  
62 involved nor have robust validation criteria emerged to allay long-cultivated fears of over-fitting (13).  
63 Approaches from time-resolved crystallography (14) apply only to specialised experiments.

## 64 **New Approach**

65 In order to obtain unencumbered views of the changed, non-ground state, and extract the  
66 appropriate signal from conventional single-dataset density, we recast the problem as a multi-dataset,  
67 3D background correction problem. An accurate estimate of the background can be obtained by  
68 averaging near-convergence density, in real space and after local alignment, from dozens (>30) of  
69 independently measured but approximately identical ground state crystals. Subtraction of a suitable  
70 fraction of this background estimate from the near-convergence density of a dataset containing a  
71 putative changed state yields a residual partial-difference map that we call an *event map* and that is in  
72 general fully interpretable (Figure 1):

$$[\text{event map}] = [\text{observed map}] - \text{BDC} * [\text{ground state map}]. \quad (1)$$

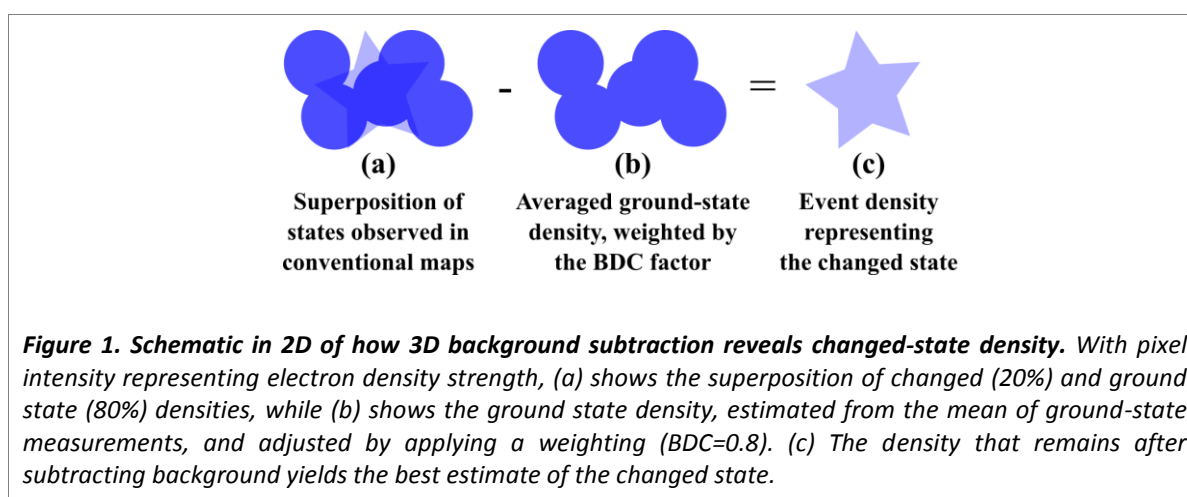

73 Our new method – Pan-Dataset Density Analysis (PanDDA) – comprises: the characterisation of a set  
74 of related crystallographic datasets of the same crystal form; the identification of (binding) events; and  
75 the subtraction of ground state density to reveal clear density for events. Identifying the optimal  
76 Background Density Correction factor (BDC) is essential for extracting the best signal, illustrated  
77 schematically in Figure 2.

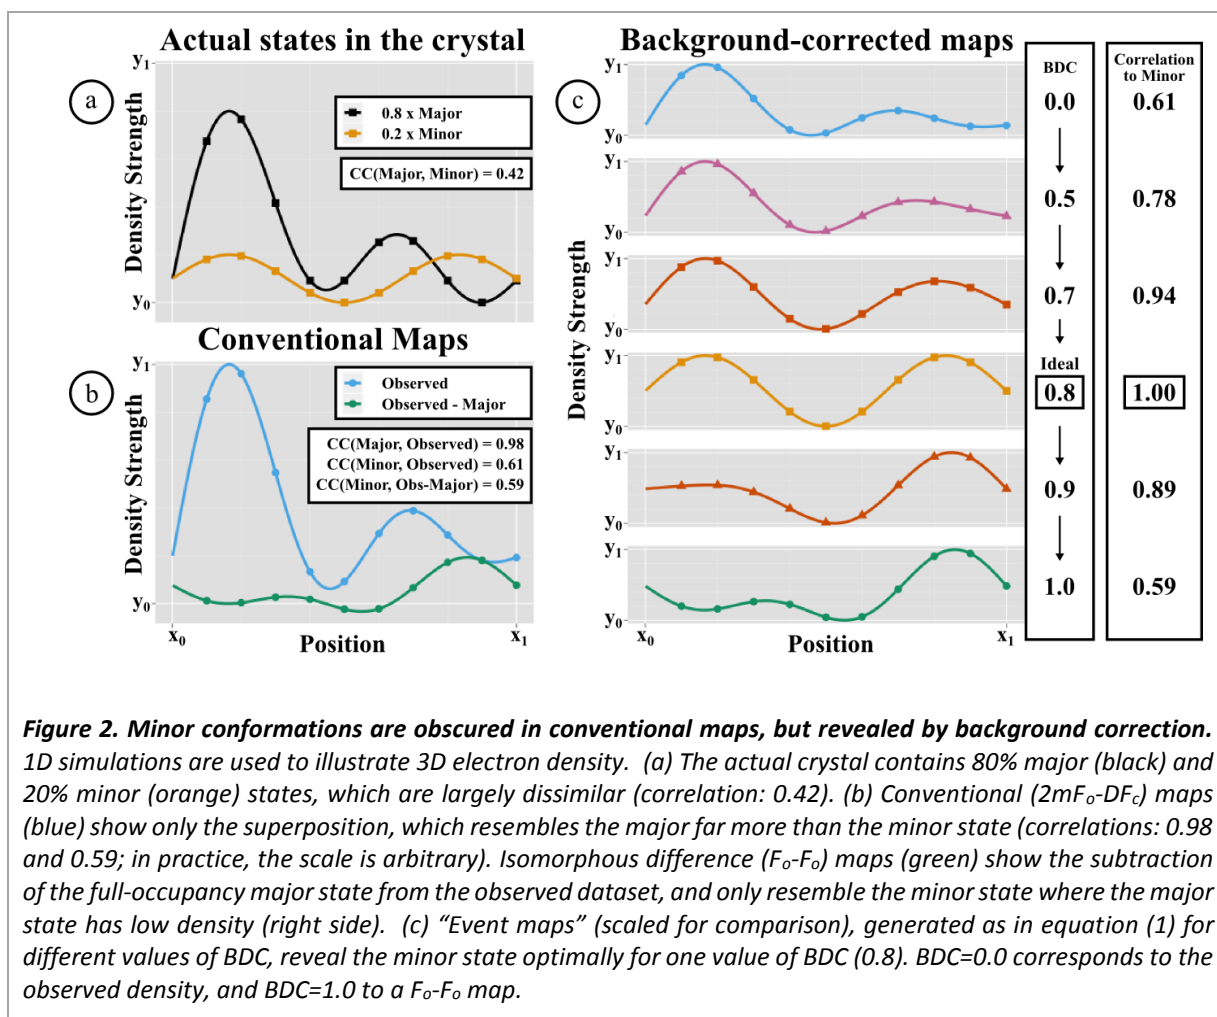

78 The method builds on the principle of isomorphous difference ( $F_o-F_o$ ) maps (15), but analyses many  
 79 maps simultaneously by (a) locally aligning maps in real space to bypass the requirement of strict  
 80 isomorphism, and (b) directly comparing the best estimate of true electron density, namely sigmaA-  
 81 weighted ( $2mF_o-DF_c$ ) maps from late-stage refinement, ensuring maps are correctly scaled.

82 Using multiple maps allows a Z-score measure to be calculated, reflecting how significantly each  
 83 dataset deviates from the ensemble of datasets at each point in space. Z-scores are assembled into  
 84 spatial Z-maps, where clusters of large Z-scores are an objective and statistically meaningful measure  
 85 for potentially interesting crystallographic signal – *events* – such as a binding ligand. Using Z-maps  
 86 addresses the common pitfall of over-interpreting density that is in fact ground state density, since in  
 87 such cases, Z-scores will be small. Equally importantly, Z-maps also make it possible to identify weak  
 88 changed states (e.g. weakly-bound ligands) that do not yield strong difference ( $mF_o-DF_c$ ) density.

89 Finally, the precise localisation of each change enables reliable background subtraction at that site,  
90 because BDC can be estimated as the value for which the ground state-subtracted map is locally least  
91 correlated to the ground-state map, relative to a normalising global correlation across the unit cell  
92 (Supplementary D). Using the average map both reduces noise of the ground-state estimate and  
93 thereby of the event map, and provides a less-biased estimate of the true ground-state, which a single-  
94 dataset map cannot, as it is inherently biased by the model. A correct estimate of BDC results in event  
95 map density for only the changed configuration of the site, including protein backbone and side-chain  
96 conformations induced by the change.

## 97 Results

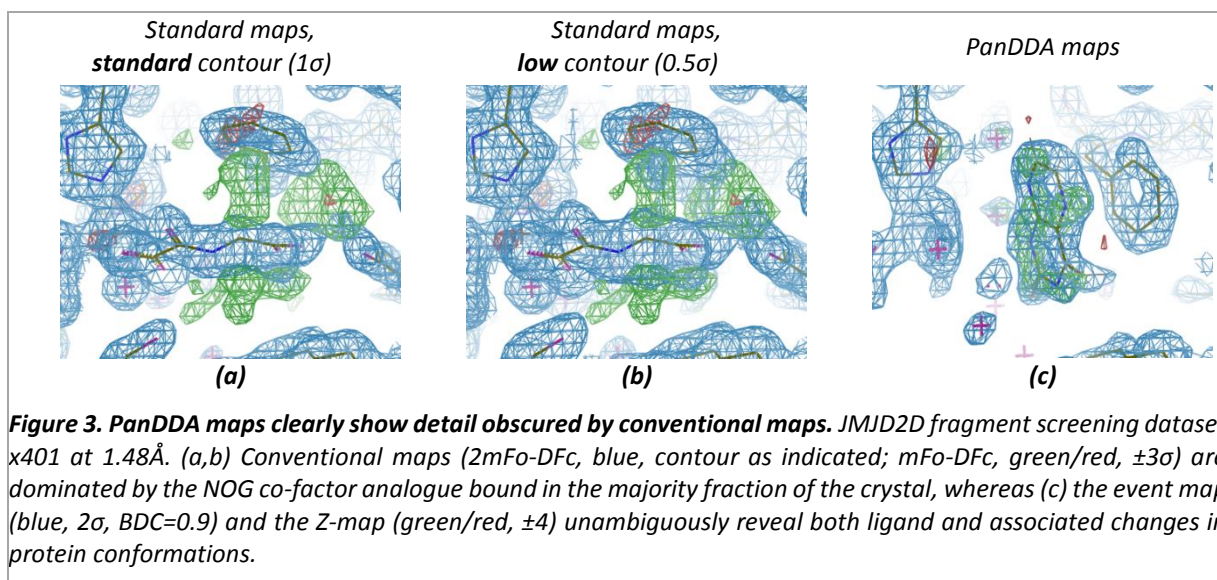

98 Crystallographic fragment screening (16, 17) represents an extreme case of changed-state studies,  
99 because it attempts to observe in electron density the rare and often low occupancy binding events  
100 that occur when a relatively large (200-1000) library of weak-binding “fragment” compounds (150-  
101 300Da, 100 $\mu$ M-10mM) (18, 19) are added individually or as cocktails to a series of equivalent crystals.  
102 Conventionally, the analysis is challenging as it involves inspecting a lot of 3D space – the whole unit  
103 cell in all datasets – for convincing evidence of bound fragments (“hits”). In contrast, PanDDA directly  
104 eliminates the thousands of strong electron density blobs with no statistical significance, objectively  
105 identifying only regions that are unique to each dataset; the ground state datasets are provided by the  
106 many hit-free crystals.

107 Applied to a series of fragment screens (Table 1), PanDDA yielded markedly more hits than manual  
108 inspection of density, far more quickly and all with high confidence (Figure 3 & Figure 4; Supplementary  
109 Figure S1-Figure S4), in both known binding sites and new allosteric sites (Figure 4d). Several fragments  
110 induced significant reordering of sections of the protein that could only be modelled with PanDDA event  
111 maps (Figure 4a-c, Figure S1a-c), whilst also enabling the identification of mislabelled ligands and the  
112 discovery of experiment errors (Figure S1d-f, Figure S2d-f). Models erroneously built into misleading  
113 conventional density could be discarded with statistical confidence, and the binding of chemically  
114 elaborated hit compounds could be analysed more reliably. Full experimental details and complete  
115 descriptions are provided in Supplementary A. The method also effectively disambiguates density in  
116 conventional ligand-binding studies with ligands co-crystallised and a sub-optimal number of ground-  
117 state datasets (Supplementary B).

**Table 1. Hit rates from fragment screens before and after use of PanDDA.** All fragment screens consisted of a single soaked compound per dataset. An identified site comprises more than 2 binding ligands that are not heavily interacting with crystal contacts. Number of hits was determined as number of datasets containing a bound ligand. Hit rate was calculated as percentage of datasets containing bound ligands.

| Protein                                  | JMJD2D     | BAZ2B     | SP100   | BRD1       |
|------------------------------------------|------------|-----------|---------|------------|
| Datasets                                 | 226        | 200       | 116     | 292        |
| Resolution Range (Å)                     | 1.1-2.6    | 1.5-2.5   | 1.3-2.7 | 1.5-3.6    |
| Identified Hits (Human / PanDDA)         | 2 / 24     | 3 / 9     | 0 / 2   | 29 / 40    |
| Identified Hit Rate (%) (Human / PanDDA) | 0.9 / 10.6 | 1.5 / 4.5 | 0 / 1.7 | 9.9 / 13.7 |
| Identified Sites (Human / PanDDA)        | 1 / 5      | 1 / 1     | 0 / 1   | 1 / 2      |

118

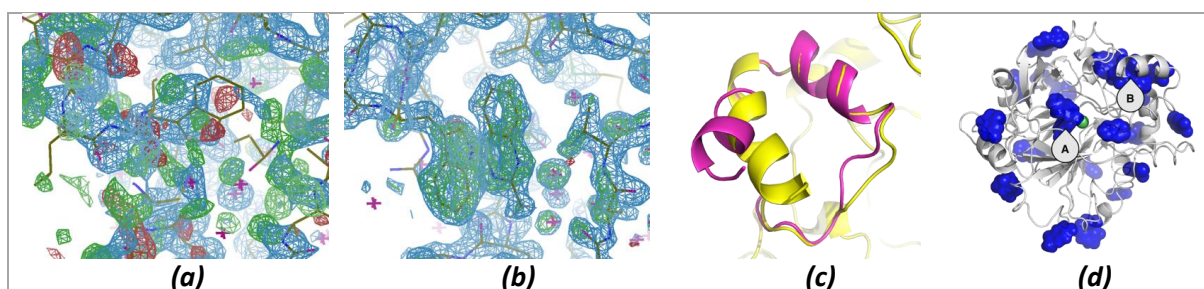

**Figure 4. PanDDA maps reveal complex minor conformations and identify allosteric binders.** In JMJD2D dataset x402 (1.45Å), (a) conventional maps (contoured as in Figure 3a) show a complex superposition difficult to model using the reference conformation (shown), while (b) in PanDDA maps (contoured as in Figure 3c) it can be modelled easily. (c) Final models for the unbound (yellow) and bound (magenta) conformations show the large conformational change. (d) Fragments are detected to bind all over the surface of JMJD2D, revealing potential allosteric sites, including the peptide-binding groove (site A) and the large helix reordering (site B).

119

120

121



122 Strikingly, detection of weak binding events is simple even when phases are far from convergence  
123 (Figure 5).

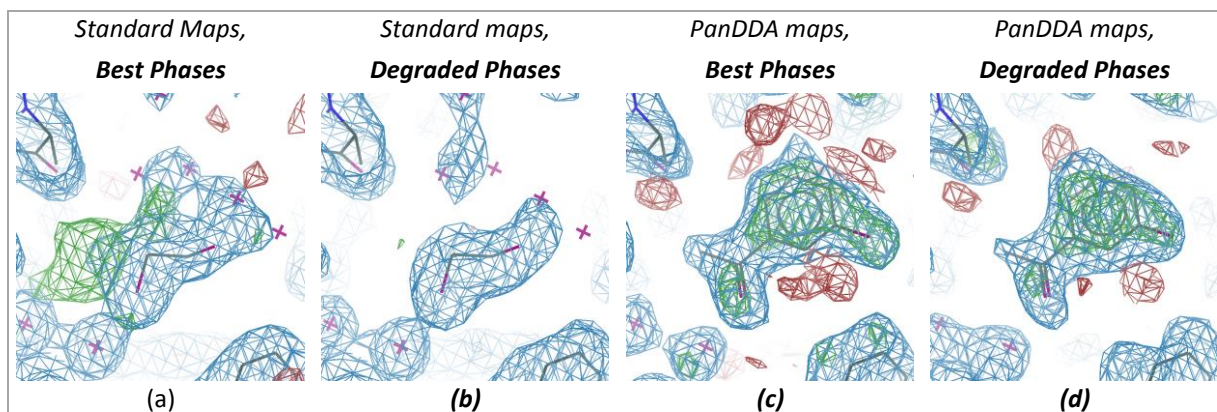

**Figure 5. Weak ligand identification remains straightforward when phases are degraded.** BAZ2B datasets were re-analysed using a deliberately sabotaged reference model, introducing a  $\sim 30^\circ$  phase error and increasing  $R_{work}$  and  $R_{free}$  by  $\sim 12\%$  for all datasets. Shown here is the weak hit (occupancy: 0.64) in dataset x492, contoured for different maps as labelled: (a,b)  $1.78\text{\AA}$  2mFo-DFc (blue,  $1\sigma$ ) and mFo-DFc (green/red,  $\pm 3\sigma$ ). (c,d)  $1.79\text{\AA}$  event (blue,  $2\sigma$ ) and Z-maps (green/red,  $\pm 3$ ).  $R_{work}/R_{free}$  are 0.18/0.21 and 0.30/0.32 for best and degraded phases respectively. BDCs for best and degraded phases are 0.77 and 0.73 respectively, and although the quality of the density for the ligand is reduced, ligand identification is no more difficult.

## 124 Validation

125 Model validation is a long-established bedrock of crystallographic analysis (13), and crucially requires  
126 a model that is numerically stable in refinement. To enable this, we generate an atomic ensemble model  
127 that reflects the crystal content by combining the ground state with the changed state modelled from  
128 event maps, with initial occupancies of  $2*(1-BDC)$ , as discussed in Supplementary D. These models are  
129 indeed well-behaved. However, we discovered that many, some built into strong event density, would  
130 be considered invalid (Figure S6) by the subjective but best-practice criterion (2) of visual assessment  
131 of agreement between model and conventional OMIT maps.

132 To address this, we formulated the following strong objective validation principles:

- 133 1. The changed-state partial model must conform to calculable numerical criteria (Table S2). We  
134 adopt established requirements: a high correlation between the model and the observed  
135 density (RSCC>0.7); that the model must not move under refinement (low rmsd before vs after);  
136 and that ligand B-factors must be comparable to those of surrounding residues. We also apply  
137 a new metric, that modelling and refinement should result in negligible difference density

138 around the site (RSZD<3) (20). These metrics are fully defined in Methods and shown for all  
139 models in Table S3-Table S6.

140 2. The ground state partial model is considered an immutable component of the crystal, with a  
141 status similar to common restraints (*e.g.* geometry or non-crystallographic symmetry), as in  
142 general there is not enough diffraction information to propose otherwise. Thus, the ground  
143 state model needs to be fully complete before incorporation into the ensemble, and during  
144 further cycles of model building, it may not be altered. To stabilise refinement, it may need to  
145 be strongly restrained to the original ground state model (by external restraints using *e.g.*  
146 PROSMART (21)).

147 3. The primary event density must always be available when disseminating such models.

148 We note that the infrastructure for criterion 3 does not currently exist in the PDB (22); and  
149 refinement programs do not yet support some external restraints that we predict will be important for  
150 numerical stability at low resolution or for very low occupancy at high resolution, in particular  
151 restraining relative B-factors to stabilise the occupancy. Both are the subject of future work.

152 In general, only the changed state will be of primary scientific interest in the refined model, with the  
153 ground state essentially an experimental artefact. Unlike the artefacts inherent in any crystal structure,  
154 here they are explicitly declared and need not be inferred by further analysis. Structure repositories,  
155 whether public (PDB) or internal, would ideally support this by removing the ground state for normal  
156 use.

## 157 Discussion

158 The PanDDA algorithm improves on current methods not only with dramatically better signal-to-  
159 noise, but also by providing rigorous measures of confidence. This allows far more subtle changes to be  
160 modelled, whose importance will be experiment- and context-dependent: in ligand development,  
161 evidence of weak binding is now known to be productive for optimising binding potency (23).

162 We thus propose a new standard practice for ligand binding and other changed-state studies,  
163 namely collecting a series of ground state datasets before proceeding with the putative changed-state  
164 datasets, to provide the contrast necessary to see the changes of interest. Approximately 30 datasets



165 are required for *full* convergence of the statistical model (Supplementary I), an experiment that can be  
166 completed within hours at modern synchrotron beamlines with fast pixel detectors (24) and sample  
167 automation (25), and that needs to be performed only once per crystal form. To address the other  
168 bottleneck, the logistics of analysing large numbers of datasets, the PanDDA implementation includes  
169 graphical tools and various command-line options. However, the method also works when fewer than  
170 30 datasets are available (Supplementary B), the trade-off being potentially reduced quality of the event  
171 maps; determining the break-even number of datasets for a given case is the subject of future work.

172 The PanDDA method is applicable and effective at any resolution, though at lower resolutions, as  
173 maps become less precise, higher occupancies of changed states will in general be required for them to  
174 be detected by Z-score. What matters most is the consistency of ground-state models so that they can  
175 be well-represented by an average; therefore, in regions of crystals that tend to vary stochastically,  
176 such as crystal contacts, statistical confidence is reduced similarly to low resolutions.

177 As the algorithm is a contrast-maximisation approach, event map density for changes appears  
178 somewhat stronger than density for unchanged atoms (typically, surrounding protein). In practice, this  
179 is not problematic, as unchanged conformations do not require modelling anyway, as more fully  
180 discussed in Supplementary D.

181 In principle, the approach will allow comparisons between different crystal forms of the same  
182 protein. However, since functionally important conformational changes are not only common in such  
183 cases but by their nature affect the functionally interesting regions, algorithmic treatment of the local  
184 alignment is complex and the topic of future work.

185 Our results upend a long-held tenet in macromolecular crystallographic model building, that to  
186 visualise subtle features requires optimal phase estimates and thus a model as complete and *globally*  
187 error-free as possible (1). Conscientiously observed, this places a heavy time burden on the analysing  
188 scientist as it demands multiple iterations of modelling for each dataset. The PanDDA approach makes  
189 this both practically and theoretically unnecessary: a single local modelling step fully validates an  
190 interpretation, even when the model retains problems elsewhere.

191 More generally, we submit that a qualitative shift in approaches to generating crystallographic  
192 models is now due. PanDDA addresses one class of experiments, those involving induced local changes,  
193 but all problems of uninterpretable density, and indeed some of the R-factor gap (6), should be  
194 addressable by analogous map deconvolution methods. Multi-dataset experiments are no longer  
195 difficult; nevertheless, existing tools focus on pursuing a single, representative dataset through  
196 averaging (26). Instead, what will be key is establishing methods for targeted perturbations of poorly  
197 ordered regions, along with rigorous algorithms for reconstructing and visualising discrete states, and  
198 for subsequent model validation.

## 199 References

- 200 1. J. Schiebel *et al.*, High-Throughput Crystallography: Reliable and Efficient Identification of Fragment Hits.  
201 *Structure*, 1–12 (2016).
- 202 2. E. Pozharski, C. X. Weichenberger, B. Rupp, Techniques, tools and best practices for ligand electron-  
203 density analysis and results from their application to deposited crystal structures. *Acta Crystallogr. Sect.*  
204 *D Biol. Crystallogr.* **69**, 150–167 (2013).
- 205 3. R. Stanfield, E. Pozharski, B. Rupp, Comment on Three X-ray Crystal Structure Papers. *J. Immunol.* **196**,  
206 521–524 (2016).
- 207 4. B. Rupp, B. Segelke, Questions about the structure of the botulinum neurotoxin B light chain in complex  
208 with a target peptide. *Nat. Struct. Biol.* **8**, 663–664 (2001).
- 209 5. G. M. Sheldrick, A short history of SHELX. *Acta Crystallogr. Sect. A Found. Crystallogr.* **64**, 112–122 (2007).
- 210 6. J. M. Holton, S. Classen, K. A. Frankel, J. A. Tainer, The R-factor gap in macromolecular crystallography: an  
211 untapped potential for insights on accurate structures. *FEBS J.* **281**, 4046–4060 (2014).
- 212 7. B. T. Burnley, P. V. Afonine, P. D. Adams, P. Gros, Modelling dynamics in protein crystal structures by  
213 ensemble refinement. *Elife*, **1**, e00311 (2012).
- 214 8. M. A. DePristo, P. I. W. De Bakker, R. J. K. Johnson, T. L. Blundell, Crystallographic refinement by  
215 knowledge-based exploration of complex energy landscapes. *Structure*. **13**, 1311–1319 (2005).
- 216 9. H. Van Den Bedem, A. Dhanik, J. C. Latombe, A. M. Deacon, Modeling discrete heterogeneity in X-ray  
217 diffraction data by fitting multi-conformers. *Acta Crystallogr. Sect. D Biol. Crystallogr.* **65**, 1107–1117  
218 (2009).
- 219 10. P. T. Lang *et al.*, Automated electron-density sampling reveals widespread conformational polymorphism  
220 in proteins. *Protein Sci.* **19**, 1420–1431 (2010).
- 221 11. P. T. Lang, J. M. Holton, J. S. Fraser, T. Alber, Protein structural ensembles are revealed by redefining X-  
222 ray electron density noise. *Proc. Natl. Acad. Sci. USA.* **111**, 237–42 (2014).
- 223 12. R. J. Read, Improved Fourier coefficients for maps using phases from partial structures with errors. *Acta*  
224 *Crystallogr. Sect. A Found. Crystallogr.* **42**, 140–149 (1986).
- 225 13. G. J. Kleywegt, T. A. Jones, Where freedom is given, liberties are taken. *Structure*. **3**, 535–540 (1995).
- 226 14. B. a Yorke, G. S. Beddard, R. L. Owen, A. R. Pearson, Time-resolved crystallography using the Hadamard  
227 transform. *Nat. Methods*. **11**, 1131–1134 (2014).
- 228 15. M. a. Rould, C. W. Carter, Isomorphous Difference Methods. *Methods Enzymol.* **374**, 145–163 (2003).
- 229 16. D. Patel, J. D. Bauman, E. Arnold, Advantages of crystallographic fragment screening: Functional and  
230 mechanistic insights from a powerful platform for efficient drug discovery. *Prog. Biophys. Mol. Biol.* **116**,  
231 92–100 (2014).
- 232 17. O. B. Cox *et al.*, A poised fragment library enables rapid synthetic expansion yielding the first reported  
233 inhibitors of PHIP(2), an atypical bromodomain. *Chem. Sci.* **7**, 2322–2330 (2016).
- 234 18. C. W. Murray, M. L. Verdonk, The consequences of translational and rotational entropy lost by small  
235 molecules on binding to proteins. *J. Comput. Aided. Mol. Des.* **16**, 741–753 (2002).

- 236 19. W. T. M. Mooij *et al.*, Automated protein-ligand crystallography for structure-based drug design.  
237 *ChemMedChem*. **1**, 827–838 (2006).
- 238 20. I. J. Tickle, Statistical quality indicators for electron-density maps. *Acta Crystallogr. Sect. D Biol. Crystallogr.*  
239 **68**, 454–467 (2012).
- 240 21. R. A. Nicholls, F. Long, G. N. Murshudov, Low-resolution refinement tools in REFMAC5. *Acta Crystallogr.*  
241 *Sect. D Biol. Crystallogr.* **68**, 404–417 (2012).
- 242 22. H. M. Berman *et al.*, The Protein Data Bank. *Nucleic Acids Res.* **28**, 235–42 (2000).
- 243 23. J. Schiebel *et al.*, Six Biophysical Screening Methods Miss a Large Proportion of Crystallographically  
244 Discovered Fragment Hits: A Case Study. *ACS Chem. Biol.*, acschembio.5b01034 (2016).
- 245 24. M. Mueller, M. Wang, C. Schulze-Briese, Optimal fine phi-slicing for single-photon-counting pixel  
246 detectors. *Acta Crystallogr. Sect. D Biol. Crystallogr.* **68**, 42–56 (2012).
- 247 25. J. R. Helliwell, E. P. Mitchell, Synchrotron radiation macromolecular crystallography: Science and spin-offs.  
248 *IUCrJ*. **2**, 283–291 (2015).
- 249 26. J. Foadi *et al.*, Clustering procedures for the optimal selection of data sets from multiple crystals in  
250 macromolecular crystallography. *Acta Crystallogr. Sect. D Biol. Crystallogr.* **69**, 1617–1632 (2013).
- 251 27. R. W. Grosse-Kunstleve, N. K. Sauter, N. W. Moriarty, P. D. Adams, The Computational Crystallography  
252 Toolbox: Crystallographic algorithms in a reusable software framework. *J. Appl. Crystallogr.* **35**, 126–136  
253 (2002).
- 254 28. M. D. Winn *et al.*, Overview of the CCP4 suite and current developments. *Acta Crystallogr. Sect. D Biol.*  
255 *Crystallogr.* **67**, 235–242 (2011).
- 256 29. P. V. Afonine *et al.*, Towards automated crystallographic structure refinement with phenix.refine. *Acta*  
257 *Crystallogr. Sect. D Biol. Crystallogr.* **68**, 352–367 (2012).
- 258 30. P. D. Adams *et al.*, PHENIX: A comprehensive Python-based system for macromolecular structure solution.  
259 *Acta Crystallogr. Sect. D Biol. Crystallogr.* **66**, 213–221 (2010).

260

## 261 **Acknowledgements**

262 The authors thank Randy Read and Garib Murshudov for productive conversations, and Luis Ospina  
263 for discussions regarding the statistical model. All data were collected at Diamond Light Source  
264 beamline I04-1 as part of the SGC-Diamond I04-1 XChem partnership.

## 265 **Implementation**

266 PanDDA is implemented in Python and relies heavily on the CCTBX (27). It has been tested  
267 extensively for robustness and usability by users of Diamond’s XChem fragment screening facility.  
268 Source code is available on bitbucket (<http://bitbucket.org/pandda/pandda>) or as part of CCP4 (28). A  
269 manual and tutorial are available at <http://pandda.bitbucket.org>. Processing 200-500 datasets on a  
270 3.7GHz Quad-Core Intel Xeon with 32GB of RAM takes 3-10+ hours but runtime depends greatly on  
271 resolution binning and size of crystallographic unit cell.

## 272 **Data Availability**

273 All crystallographic data, models, Z-maps and event maps are available at Zenodo  
274 (<http://zenodo.org>), with the following DOIs: BAZ2B: 10.5281/zenodo.48768; BRD1:

275 10.5281/zenodo.48769; JMJD2D: 10.5281/zenodo.48770; SP100: 10.5281/zenodo.48771. Models were  
276 built for those ligands that could be uniquely identified in the event density, except for those that  
277 interact extensively with the crystal contacts and are therefore unlikely to be biochemically relevant.  
278 Models have not yet been deposited in the PDB in order to ensure adherence to the essential validation  
279 principle 3 discussed above.

## 280 **Funding**

281 NMP and CMD recognize funding from EPSRC grant EP/G037280/1, UCB Pharma and Diamond Light  
282 Source. The SGC is a registered charity (No. 1097737) that receives funds from AbbVie, Bayer,  
283 Boehringer Ingelheim, the Canada Foundation for Innovation, the Canadian Institutes for Health  
284 Research, Genome Canada, GlaxoSmithKline, Janssen, Lilly Canada, the Novartis Research Foundation,  
285 the Ontario Ministry of Economic Development and Innovation, Pfizer, Takeda and the Wellcome Trust  
286 (092809/Z/10/Z).

## 287 **Materials and Methods**

288 An overview of the PanDDA algorithm is schematically outlined in Supplementary E.

### 289 **Dataset Preparation**

290 The input to PanDDA is a series of refined crystallographic datasets, each consisting of a refined  
291 structure and associated diffraction data, including  $2mF_o - DF_c$  structure factors. These can come from  
292 any refinement program, as long as all datasets are refined using the same initial atomic model and the  
293 same protocol. All models of the protein must be identical, up to the numbering and labelling of atoms.  
294 All datasets used in this paper were prepared using the Dimple pipeline (part of CCP4 (28)), from  
295 reference models including solvent molecules; there is no requirement to remove solvent atoms from  
296 known binding sites.

### 297 **Structure and Map Alignment**

298 To allow map voxels to be compared between crystals that are not exactly isomorphous, maps are  
299 aligned using the refined models as reference points.

300 The input protein structures are aligned using a flexible alignment algorithm (Supplementary F).  
301 Sections of the protein are aligned separately, to give alignment matrices for that section. The  
302 alignments generated from the structures are stored and are used to transform and thereby align the  
303 electron density maps.

#### 304 **Handling Variations of Map Resolutions**

305 To allow map voxels to be compared between crystals, maps have to be calculated at the same level  
306 of detail, even though crystals can diffract to a wide range of resolutions. For analysing a specific  
307 dataset, its full resolution is used; but for contributing to the analysis of a different dataset, higher  
308 resolution datasets are truncated to the resolution of the target dataset, while lower resolution  
309 datasets are ignored. Therefore, we analyse the collection of datasets at a number of resolutions, and  
310 high resolution datasets are used multiple times for characterisation at lower resolutions, but will only  
311 be analysed once, at their highest possible resolution. Maps are recalculated using truncated diffraction  
312 data at each different resolution limit. Thus, if processing in resolution bins of 1.0Å, 1.5Å, 2Å, and 2.5Å,  
313 a 1.2Å dataset would be analysed at 1.5Å, but also be used to build distributions at 2Å and 2.5Å.

314 Fourier terms omitted in a given map, as happens when reflections are unobserved and then  
315 effectively set to zero, lead to systematic changes in electron density throughout the unit cell that  
316 strongly affect the outlier analysis; strong low-resolution terms are particularly problematic. Therefore,  
317 reflections in all datasets are truncated to the set of miller indices common to all datasets; and for map  
318 calculation, all missing Fourier terms are estimated as  $DF_c$ , which refinement programs perform  
319 automatically as long as the indices are correctly included in the reflection files.

320 Truncated  $2mF_o - DF_c$  structure factors are Fourier-transformed to generate maps. These maps are  
321 aligned using the alignment transformations from the local alignment (Supplementary F).

#### 322 **Statistical Model**

323 Once maps for a particular resolution have been aligned, a statistical model is parameterised using  
324 the electron density of the *ground state* datasets. The aligned maps are placed on an isotropic Cartesian  
325 grid, and the electron density is sampled at each grid point of each dataset. The model treats the  
326 observed value of the electron density in dataset  $i$ , at grid point  $m$ , as being sampled from a distribution

$$\rho_{i,m}^{observed} = \rho_m^{true} + \varepsilon_i, \quad (S1)$$

327 where  $\rho_m^{true}$  models the natural variation in the electron density at point  $m$ , independent of dataset,  
328 and  $\varepsilon_i$  represents the experimental uncertainty in the electron density in dataset  $i$ . The variability of the  
329  $\rho_m^{true}$  term accounts for the fact that the crystals are not identical, and that small local fluctuations may  
330 exist between the crystals. These areas are most likely to be in the crystal contacts, or flexible areas of  
331 the protein.  $\rho_m^{true}$  represents the “true” (unmeasurable) electron density for this crystal form, of which  
332 each crystal (and associated dataset) is a sample.

333 The simplest model is to assume that both the uncertainty in electron density values as well as  
334 variation in electron density at a point arising from differences between the crystals, can be modelled  
335 by a normal distribution. Therefore, if

$$\rho_m^{true} \sim \mathcal{N}(\mu_m, s_m^2), \text{ and } \varepsilon_i = \mathcal{N}(0, \sigma_i^2), \quad (S2)$$

336 then

$$\rho_{i,m}^{observed} \sim \mathcal{N}(\mu_m, \sigma_i^2 + s_m^2), \quad (S3)$$

337 where  $\mu_m$  is the mean value of the electron density at point  $m$ ,  $s_m$  is the variance of the “true”  
338 electron density at point  $m$ , and  $\sigma_i$  is the uncertainty in dataset  $i$ . Under this model, the parameters  $\mu_m$   
339 are estimated by taking the un-weighted average of all of the ground state densities.

340 The mean ground state map is used to estimate the dataset uncertainty,  $\sigma_i$ , for all datasets as  
341 follows. Subtracting the mean map from each dataset map we obtain a mean-difference map. By  
342 assuming that the experimental and model uncertainty in the electron density map are the major  
343 contributors to deviations from the mean map, the histogram of the mean-difference map values is  
344 used to estimate the total uncertainty of the dataset. Calculating the quantiles of a theoretical normal  
345 distribution  $\mathcal{N}(0, 1)$  and plotting them against the quantiles from the mean-difference map, yields a Q-  
346 Q plot where the slope of the central portion of the map (between the  $\pm 1.5$  theoretical quantiles) gives



347 an estimate of the uncertainty of the dataset (Figure S11a). This is equivalent to the method used in  
348 Tickle (2012) for calculating the uncertainty of an electron density map (20).

349 To estimate  $s_m$ , a maximum likelihood method is applied on our model in (S3), using the observed  
350 values  $\rho_{i,m}^{observed}$ , as well as estimates for  $\sigma_i$  and  $\mu_m$  for the *ground state* datasets (Supplementary H).  
351 An example comparison of the ‘raw’ standard deviations of the grid points (simple standard deviation  
352 of electron density values, not accounting for observation error) and the ‘adjusted’ values is shown in  
353 Figure S12. This adjustment results in the majority of points having no variation that is not accounted  
354 for by the dataset uncertainties; the remaining points have non-negligible variation, with non-zero  $s_m$ ,  
355 and these indicate naturally variable regions.

### 356 Calculation of Z-Maps

357 The parameterised statistical model allows the identification of areas of individual dataset maps that  
358 deviate significantly from the mean map: “events”. Z-scores are calculated by

$$Z_{i,m} = \frac{\rho_{i,m}^{observed} - \mu_m}{\sqrt{\sigma_i^2 + s_m^2}}, \quad (S4)$$

359 where large Z-scores indicate significant deviations from the mean map. The distributions of Z-scores  
360 for a particular dataset have improved normality compared to the simple differences from the mean  
361 (Figure S11b), as expected.

362 Regions of individual datasets are identified as significant by contouring Z-maps at  $Z=2.5$ , and  
363 filtering remaining blobs by a minimum peak value of  $Z=3$  and a minimum volume of  $10\text{\AA}^3$  (volume of a  
364 water molecule is  $\sim 30\text{\AA}^3$ ). Neighbouring blobs are grouped together if the minimum distance between  
365 them is less than  $5\text{\AA}$ . These parameters were identified on the BAZ2B dataset, and found appropriate  
366 in subsequent studies and are therefore the current program defaults.

### 367 Calculation of Event Maps

368 For identified events, the background density correction (BDC) factor is estimated as follows.  
369 Different fractions of the mean map are subtracted from the dataset map, and the correlation between

370 the resulting map and the mean map is calculated both globally and for the area around the event,  
371 defined by the blob identified in the Z-map expanded by 1Å.

372 Globally, the dataset map looks similar to the mean map, so plotting the global correlation against  
373 the subtracted fraction yields a signal-to-noise curve, dropping off at a speed related to the noise in the  
374 dataset (green dashed line, Figure S7). Locally to the identified site, however, the dataset map is a  
375 superposition between something similar to the mean map and something that is unrelated (e.g.  
376 density of bound ligand). As more of the mean map is subtracted, the local correlation between the  
377 mean map and the resulting map (black dashed line, Figure S7) will decrease faster than the global  
378 correlation. Subtracting the local correlation curve from the global correlation curve, BDC is estimated  
379 where the difference between these two correlation curves is maximised (blue solid line, Figure S7).  
380 The final event map is calculated as in equation (1).

### 381 **Model Building and Refinement**

382 Interesting sites are identified by Z-maps and modelling is performed using a combination of Z-maps  
383 and event maps, similarly to the way that  $mF_o-DF_c$  maps may be used to guide the modelling of  $2mF_o-$   
384  $DF_c$  maps. Modelling takes place in the aligned *reference* frame, as defined in Supplementary F.

385 After modelling of the changed state, the new conformations of the protein are merged with the  
386 ground state model. Atoms in the ground state that are not present or have moved in the changed state  
387 are assigned to a previously unused conformer (e.g. C). Similarly, atoms in the changed state model that  
388 are not present in the ground state, or have moved, are assigned another unused conformer (e.g. D).  
389 Atoms that are not changed between the two states remain unaltered. The resulting ensemble models  
390 are then back-transformed, using the local alignments, to the original crystallographic frame, for  
391 refinement.

392 The models in Table 1 have then been refined as an ensemble using phenix.refine (29, 30), under  
393 conventional resolution-dependant refinement protocols, with constrained occupancy groups  
394 corresponding to the bound and unbound structures to ensure that the occupancies of the bound and  
395 unbound states sum to unity.

396 Because of the methodical way in which the ensembles are generated, the changed state model can  
397 be extracted simply by removing the atoms corresponding to the changed ground state atoms (i.e.  
398 conformer C in the above example).

### 399 **Validation**

400 The atomic model of the changed state is validated by 4 quality metrics (Table S2). Two are electron  
401 density scores, generated by *EDSTATS* (20): RSCC reflects the fit of the atoms to the experimental  
402 density, and should typically be greater than 0.7; while RSZD measures the amount of difference density  
403 that is found around these atoms, and should be below 3. The B-factor ratio measures the consistency  
404 of the model with surrounding protein, and is calculated from the B-factors of respectively the changed  
405 atoms and all side-chain atoms within 4Å. Large values (>3) reflect poor evidence for the model, and  
406 intermediate values (1.5+) indicate errors in refinement or modelling; for weakly-binding ligands,  
407 systematically large ratios may be justifiable. RMSD compares the positions of all atoms built into event  
408 density, with their positions after final refinement, and should be below 1Å.

### 409 **List of Supplementary Materials**

410 Supplementary Figures S1-S13  
411 Supplementary Tables S1-S7  
412 Supplementary A - Fragment Screening Datasets  
413 Supplementary B - Ligand Screening Studies  
414 Supplementary C - Ligand Validation  
415 Supplementary D - Background Density Correction  
416 Supplementary E - PanDDA Implementation  
417 Supplementary F - Flexible Alignment  
418 Supplementary G - Uncertainty and Z-Map Calculation  
419 Supplementary H - Estimation of Density Variability  
420 Supplementary I - Statistical Model Convergence  
421
